# Supplementary material for: Conjunctival T Cell Profile in Allogeneic Hematopoietic Stem Cell Transplant Patients after Instilling Topical Cyclosporine-A 0.1% Cationic Emulsion
Source: Springer Nature journal article supplement (doi:10.1007/s40123-023-00686-0), 2023-03-01
Supplement: MOESM2 [file 24079982]

Supplementary material

**Title:** Conjunctival T cell profile in Allogeneic Haematopoietic Stem Cell Transplant patients after instilling Topical Cyclosporine-A 0.1% cationic emulsion

**Short title:** Conjunctival T cell changes after topical cyclosporine in HSCT patients

**Authors:** Louis Tong<sup>1,2,3,4</sup>, Elizabeth Wen Ling Lim<sup>2</sup>, Sharon Wan Jie Yeo<sup>2</sup>, Aihua Hou<sup>2,3</sup>, Yeh Ching Linn<sup>5</sup>, Aloysius Ho<sup>5</sup>, Hein Than<sup>5</sup>, Jeffrey Kim Siang Quek<sup>5</sup>, William Ying Khee Hwang<sup>5</sup>, Francesca Lorraine Wei Inng Lim<sup>5</sup>, Li Lim<sup>1,2,3</sup>

<sup>1</sup>Corneal and External Eye Disease Service, Singapore National Eye Centre, 11 Third Hospital Avenue, Singapore 168751

<sup>2</sup>Ocular Surface Research Group, Singapore Eye Research Institute, 20 College Road Discovery Tower Level 6, The Academia, Singapore 169856

<sup>3</sup>Eye-Academic Clinical Program, Duke-National University of Singapore Medical School, 8 College Road, Singapore 169857

<sup>4</sup>Department of Ophthalmology, Yong Loo Lin School of Medicine, National University of Singapore

<sup>5</sup>Department of Haematology, Singapore General Hospital, 31 Third Hospital Ave, Singapore 168753

**Contact for correspondence and reprints:**

Li Lim

Address: 11 Third Hospital Ave, Singapore 168751, Singapore

Tel: +65 62277255

Fax: +65 62277290

E-mail address: limli98@yahoo.com

Supplementary material

Supplementary Table 1: Indication for allo-HSCT in each patient

| <b>Subject ID</b> | <b>Diagnosis</b>                                        | <b>GVHD Prophylaxis Regimen</b>                   | <b>Conjunctival T cell profile *</b> |
|-------------------|---------------------------------------------------------|---------------------------------------------------|--------------------------------------|
| IKERVIS001        | Myelodysplastic syndrome with excess blasts             | Cyclosporin, Methotrexate                         | Profile 2                            |
| IKERVIS002        | Acute Myeloid Leukemia in second complete remission 2   | Cell selection FK506                              | -                                    |
| IKERVIS003        | Acute Myeloid Leukaemia                                 | Cyclosporin, Methotrexate                         | -                                    |
| IKERVIS004        | Acute Myeloid Leukemia                                  | Cyclosporin, Methotrexate                         | -                                    |
| IKERVIS005        | Acute myeloid leukaemia                                 | Cyclosporin, Methotrexate                         | -                                    |
| IKERVIS006        | Acute myeloid leukemia                                  | Antithymocyte Globulin, Cyclosporin, Methotrexate | Profile 2                            |
| IKERVIS007        | Mycosis Fungoides                                       | Tacrolimus, Mycophenolate Mofetil                 | -                                    |
| IKERVIS008        | Myelodysplastic syndromes                               | PTCY, Cyclosporin, Mycophenolate sodium           | -                                    |
| IKERVIS009        | Chronic myeloid leukemia in blast crisis                | Tacrolimus                                        | Profile 2                            |
| IKERVIS010        | Anaplastic large cell lymphoma, block negative          | Cyclosporin, Mycophenolate sodium                 | Profile 1                            |
| IKERVIS011        | Acute myeloid leukaemia                                 | Tacrolimus                                        | -                                    |
| IKERVIS012        | Chronic myeloid leukaemia in second chronic phase       | Cyclosporin, Methotrexate                         | Profile 1                            |
| IKERVIS013        | Relapsed Acute Myeloid Leukemia in complete remission 2 | Cyclosporin, Mycophenolate sodium                 | Profile 1                            |
| IKERVIS014        | Acute Myeloid Leukemia                                  | Cyclosporin, Mycophenolate sodium                 | Profile 1                            |
| IKERVIS015        | PRV Transformed                                         | Cyclosporin, Mycophenolate sodium                 | -                                    |
| IKERVIS016        | Severe aplastic anemia                                  | Post transplant cyclophosphamide FK506 orally     | Profile 1                            |
| IKERVIS019        | Acute Myeloid Leukemia                                  | Tacrolimus                                        | -                                    |
| IKERVIS020        | Relapse Acute Myeloid Leukemia in complete remission 2  | Tacrolimus                                        | -                                    |

Supplementary material

|                |                           |                                                      |           |
|----------------|---------------------------|------------------------------------------------------|-----------|
| IKERVIS0<br>21 | Chronic Myeloid Leukaemia | Methotrexate, cyclosporine,<br>mycophenolate mofetil | Profile 1 |
|----------------|---------------------------|------------------------------------------------------|-----------|

*HSCT: hematopoietic stem cell transplantation*

\*Refer to Supplementary Table 5

## Supplementary material

Supplementary Table 2: demographics of patients and donors

| Subject    | Patient |        |           | Donor |        |                |                        |
|------------|---------|--------|-----------|-------|--------|----------------|------------------------|
|            | Age     | Gender | Ethnicity | Age   | Gender | Donor relation | HLA matching           |
| IKERVIS001 | 47      | M      | Others    | 43    | M      | Brother        | Full matched Sibling   |
| IKERVIS002 | 57      | F      | Chinese   | 26    | M      | Son            | Haploidentical         |
| IKERVIS003 | 64      | M      | Chinese   | 59    | M      | Brother        | Full matched Sibling   |
| IKERVIS004 | 30      | M      | Malay     | 30    | M      | Unrelated      | Full matched Unrelated |
| IKERVIS005 | 60      | F      | Chinese   | 57    | M      | Brother        | Full matched Sibling   |
| IKERVIS006 | 37      | M      | Chinese   | 32    | M      | Unrelated      | Full matched Unrelated |
| IKERVIS007 | 27      | M      | Chinese   | 48    | M      | Unrelated      | Full matched Unrelated |
| IKERVIS008 | 57      | M      | Chinese   | 28    | M      | Nephew         | Haploidentical         |
| IKERVIS009 | 54      | M      | Chinese   | 56    | M      | Brother        | Full matched Sibling   |
| IKERVIS010 | 35      | M      | Chinese   | 42    | F      | Sister         | Full matched Sibling   |
| IKERVIS011 | 59      | M      | Malay     | 23    | M      | Son            | Haploidentical         |
| IKERVIS012 | 59      | F      | Chinese   | 64    | F      | Sister         | Full matched Sibling   |
| IKERVIS013 | 30      | F      | Chinese   | 34    | M      | Brother        | Full matched Sibling   |
| IKERVIS014 | 61      | F      | Chinese   | 25    | M      | Unrelated      | Full matched Unrelated |
| IKERVIS015 | 62      | F      | Chinese   | 23    | F      | Unrelated      | Mismatched Unrelated   |
| IKERVIS016 | 50      | M      | Chinese   | 16    | M      | Son            | Haploidentical         |
| IKERVIS019 | 63      | M      | Chinese   | 31    | M      | Son            | Haploidentical         |
| IKERVIS020 | 50      | F      | Malay     | 42    | M      | Brother        | Haploidentical         |
| IKERVIS021 | 26      | M      | Chinese   | 24    | M      | Brother        | Full matched Sibling   |

Supplementary material

Supplementary Table 3: Subjects not included in conjunctival T cell analysis

| Subject ID | Conjunctival T cell data  | Reason                                                                                    |
|------------|---------------------------|-------------------------------------------------------------------------------------------|
| IKERVIS002 | Not available             | Machine was under maintenance                                                             |
| IKERVIS003 | Only data from one visit  | Due to MRSA infection                                                                     |
| IKERVIS004 | Only data from one visit  | Due to CP-CRE infection                                                                   |
| IKERVIS005 | Only data from one visit  | Due to MRSA                                                                               |
| IKERVIS007 | Only data from one visit  | Lab technician not available                                                              |
| IKERVIS008 | Only data from one visit  | Withdrawn                                                                                 |
| IKERVIS015 | Only data from two visits | Too few cells                                                                             |
| IKERVIS019 | Only data from one visit  | Withdrawn                                                                                 |
| IKERVIS020 | Only data from one visit  | Lab technician not available at visit 4, will collect impression at visit 5 (last visit). |

*HSCT: hematopoietic stem cell transplantation; MRSA: methicillin-resistant staphylococcus aureus; CP-CRE: carbapenemase producing carbapenem-resistant Enterobacteriaceae*

Supplementary material

Supplementary Table 4: Data from study visit number included in the analysis in Table 2

| Number of months post-HSCT that data was collected for use in analysis when laboratory and Schirmer's test were last performed* |    |
|---------------------------------------------------------------------------------------------------------------------------------|----|
| IKERVIS 001                                                                                                                     | 12 |
| IKERVIS 002                                                                                                                     | 12 |
| IKERVIS 003                                                                                                                     | 12 |
| IKERVIS 004                                                                                                                     | 6  |
| IKERVIS 005                                                                                                                     | 12 |
| IKERVIS 006                                                                                                                     | 12 |
| IKERVIS 007                                                                                                                     | 12 |
| IKERVIS 008                                                                                                                     | 6  |
| IKERVIS 009                                                                                                                     | 12 |
| IKERVIS 010                                                                                                                     | 12 |
| IKERVIS 011                                                                                                                     | 12 |
| IKERVIS 012                                                                                                                     | 12 |
| IKERVIS 013                                                                                                                     | 12 |
| IKERVIS 014                                                                                                                     | 12 |
| IKERVIS 015                                                                                                                     | 6  |
| IKERVIS 016                                                                                                                     | 12 |
| IKERVIS 019                                                                                                                     | 3  |
| IKERVIS 020                                                                                                                     | 6  |
| IKERVIS 021                                                                                                                     | 6  |

\*for patients with post-HSCT data < 12 months, they were still followed up by the haematologists and did not have any ocular complaints (were not referred back to eye)  
*HSCT: hematopoietic stem cell transplantation*

## Supplementary material

### Annex A: Detailed description of the methodology used in the collection of data

#### Non-invasive keratography tear break up time

The Oculus Keratograph 5M (Oculus, Wetzlar, Germany) was used to perform the non-invasive keratograph tear break up time (NIK BUT). Participants were first seated and allowed to blink freely while fixing on a target ahead. Once ready, participants were asked to blink twice and then refrain from further blinking. The fully automated instrument captured breaks or distortions in the image of the projected Placido rings on the cornea and the timings were automatically recorded. One reading was taken per eye and averaged, higher readings indicating more tear stability.<sup>23</sup>

#### Conjunctival redness

Conjunctival redness was measured by the Oculus Keratograph 5M (Oculus, Wetzlar, Germany). After scanning the ocular surface and images captured, grading of the conjunctival hyperemia (0-4) was automatically performed with subtraction of major conjunctival blood vessels, and temporal bulbar, nasal bulbar and average readings will be obtained. Higher redness scores indicate more hyperemia.<sup>24</sup>

#### Tear osmolarity

Tear osmolarity was measured with the TearLab system (OcuSense, San Diego, CA), a simple and highly specific point-of-care method of measuring tear osmolarity in mOsm.<sup>29</sup> Briefly, a non-traumatic touch pen was applied to the lower tear meniscus of each eye, and as little as 50 nL of tear collected instantly. After docking the pen into the reader, the result was obtained within seconds. One osmolarity reading on each eye will be analysed.

#### Lipid layer thickness (LipiView)

The lipid layer thickness of the tear film was assessed using the interferometer (LipiView® ocular surface interferometer, TearScience Inc, Morrisville, NC). The participant was seated in front of the instrument with his head positioned on the chin and forehead rest. The instrument captured the interferometer pattern of the tear film, which was subsequently used to calculate the lipid layer of the tear film, while the participant was blinking normally. This procedure took around 30 seconds for each eye.

#### Infra-red Meibography

This was performed as described by *Arita et al.*<sup>27</sup> with the exception that the Oculus Keratograph 5M (Oculus, Wetzlar, Germany) was used. The main advantage of this type of Meibography was that eversion of the tarsal plates and transillumination with a separate light source were not required. This procedure was previously approved by the IRB (CIRB Ref 2008/611/A) and for another clinical protocol (CIRB 2010/316/A).

#### Schirmer test

Schirmer test was done with the standard 5 mm wide Test Strips (Clement Clark) with a notch for folding, without prior anaesthesia. The strips were positioned over the inferior temporal half of the lower lid margin in both eyes, and participants' eyes were closed. The extent of the wetting was recorded after 5 minutes, and strips stored at -80°C until further analysis.<sup>35</sup>

#### Tear cytokines

Proteins were eluted using our previous protocol.<sup>35</sup> The schirmer strips were longitudinally halved, and from the half strip, we eluted proteins into 110 microliters of assay buffer. Tear cytokines were evaluated using the multiplex bead-based indirect immunofluorescent assay (Milliplex, Merck-Millipore, Billerica, MA). Cytokine concentrations were normalized to the length of wetting of the Schirmer strips, adding 3 mm for the rounded portion of the strip proximal to the notch. The advantage of this technique was that 15 cytokines could be assayed using a minimum amount of tear.

## Supplementary material

### Corneal fluorescein staining score (CCLRU)

Fluorescein staining was performed as previously described.<sup>35</sup> A drop of saline was instilled on the fluorescein strip (Fluorets) then shaken off so that no visible drop remained. The cornea staining was subsequently imaged by the Oculus Keratograph 5M (Oculus, Wetzlar, Germany) and scored in 5 corneal zones as in the Center for Contact Lens Research Unit (CCLRU) scale. In each zone, the grade was 0-4, with 0.5 unit intervening steps, a greater number indicating more intense or greater area of staining.<sup>28</sup>
